# Supplementary material for: Assessing doping strategies for monolayer MoS2 towards non-enzymatic detection of cortisol: a first-principles study
Source: Royal Society of Chemistry journal article supplement (doi:10.1039/d1cp04116a), 2021-12-14
Supplement: d1cp04116a1.pdf [file d1cp04116a1.pdf]

## Supplementary Information

# Assessing doping strategies for monolayer MoS<sub>2</sub> towards non-enzymatic detection of cortisol: a first-principles study

Gabriele Boschetto,<sup>1</sup> and Aida Todri-Sanial<sup>1\*</sup>

<sup>1</sup>Laboratory of Computer Science, Robotics, and Microelectronics, University of Montpellier, CNRS, 161 Rue Ada, 34095 Montpellier, France

E-mail: aida.todri@lirmm.fr

### 1. Adsorption energies of Ni, Pd, and Pt metals on MoS<sub>2</sub>

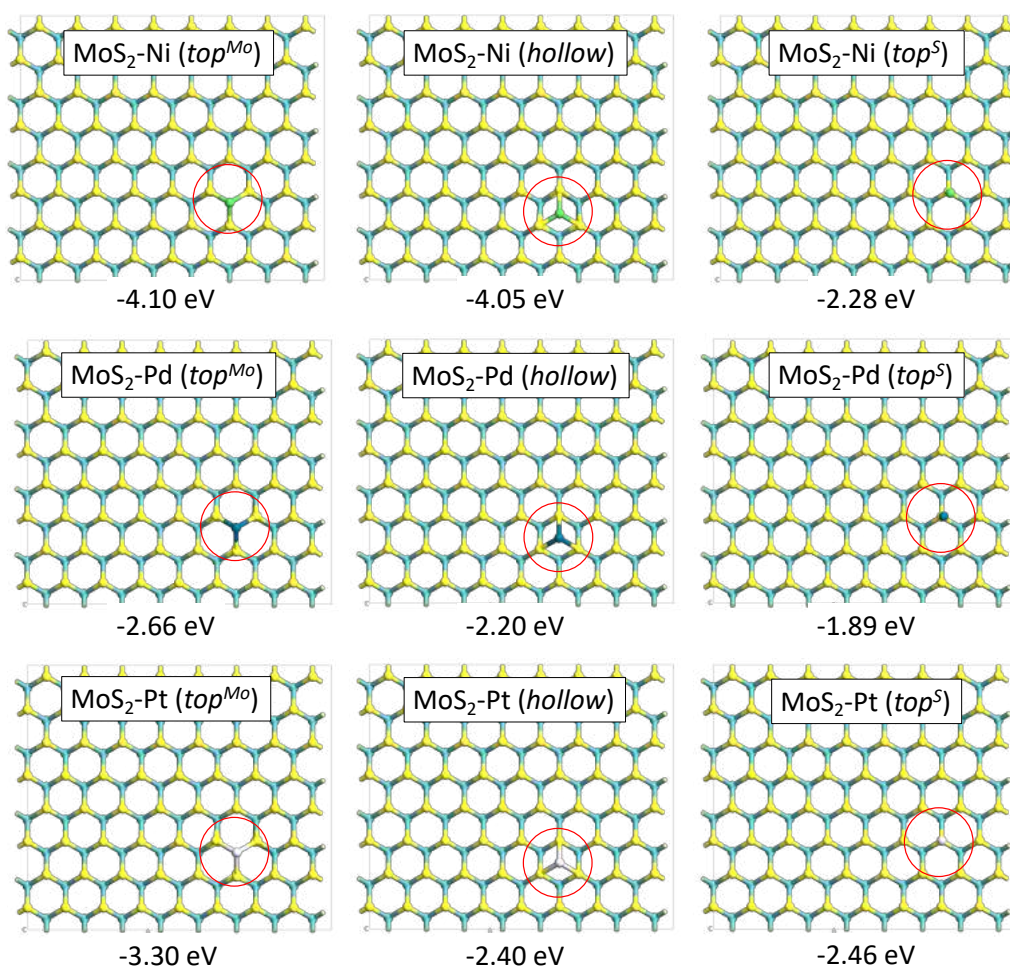

**Figure S1.** Adsorption energies of Ni, Pd, and Pt adatoms on top<sup>Mo</sup>, hollow, and top<sup>S</sup> sites of MoS<sub>2</sub>, computed at the PBE-D2 level.

## 2. Bandstructures and HOMO plots of MoS<sub>2</sub>/cortisol complexes

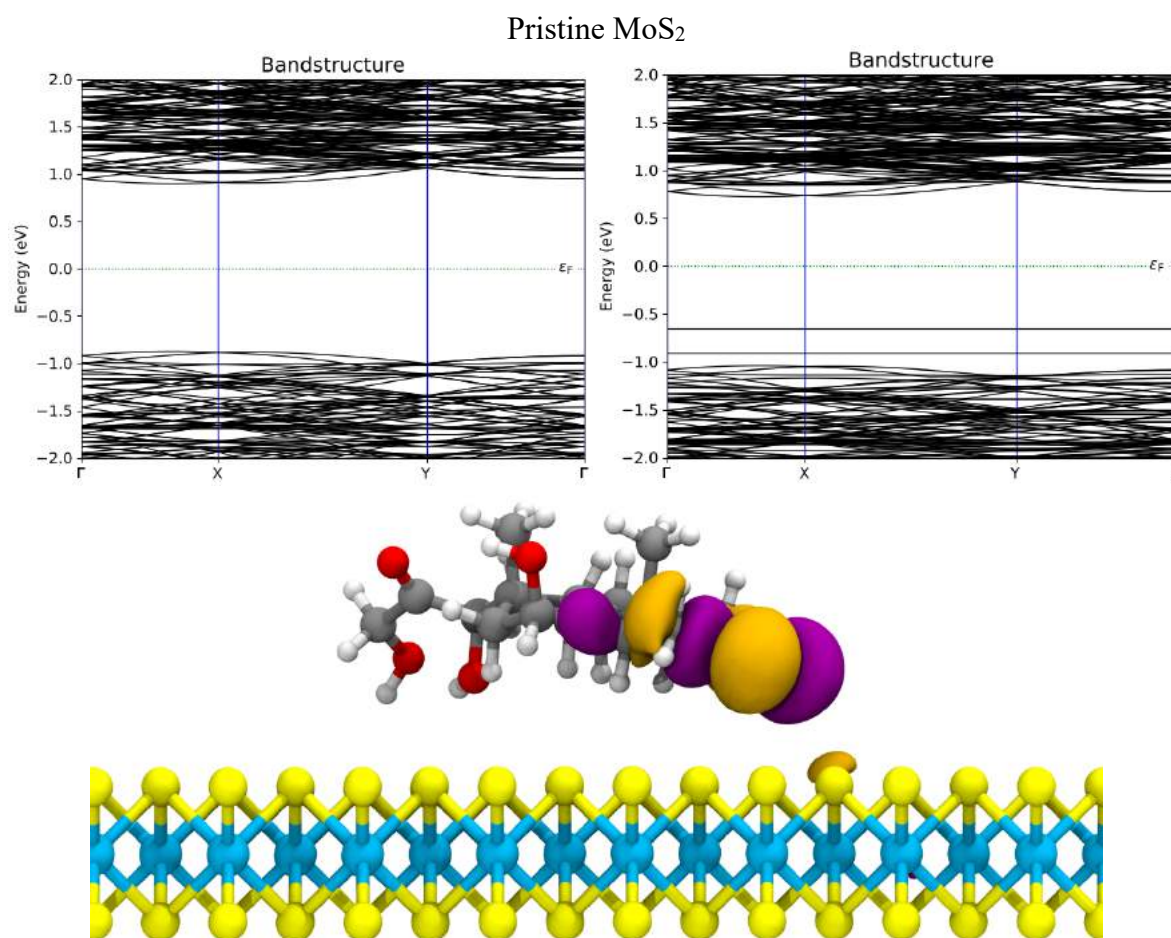

**Figure S2.** Computed DFT bandstructure of pristine MoS<sub>2</sub> with (top right) and without (top left) the presence of cortisol. The adsorption of the analyte causes the appearance of extra states above the valence bands of MoS<sub>2</sub>, as observed also in the PDOS plot of the complex (see Fig. 8 in the main text). The bottom image shows the HOMO plot of the MoS<sub>2</sub>/cortisol system (isovalue 0.02 eV/Å<sup>3</sup>).

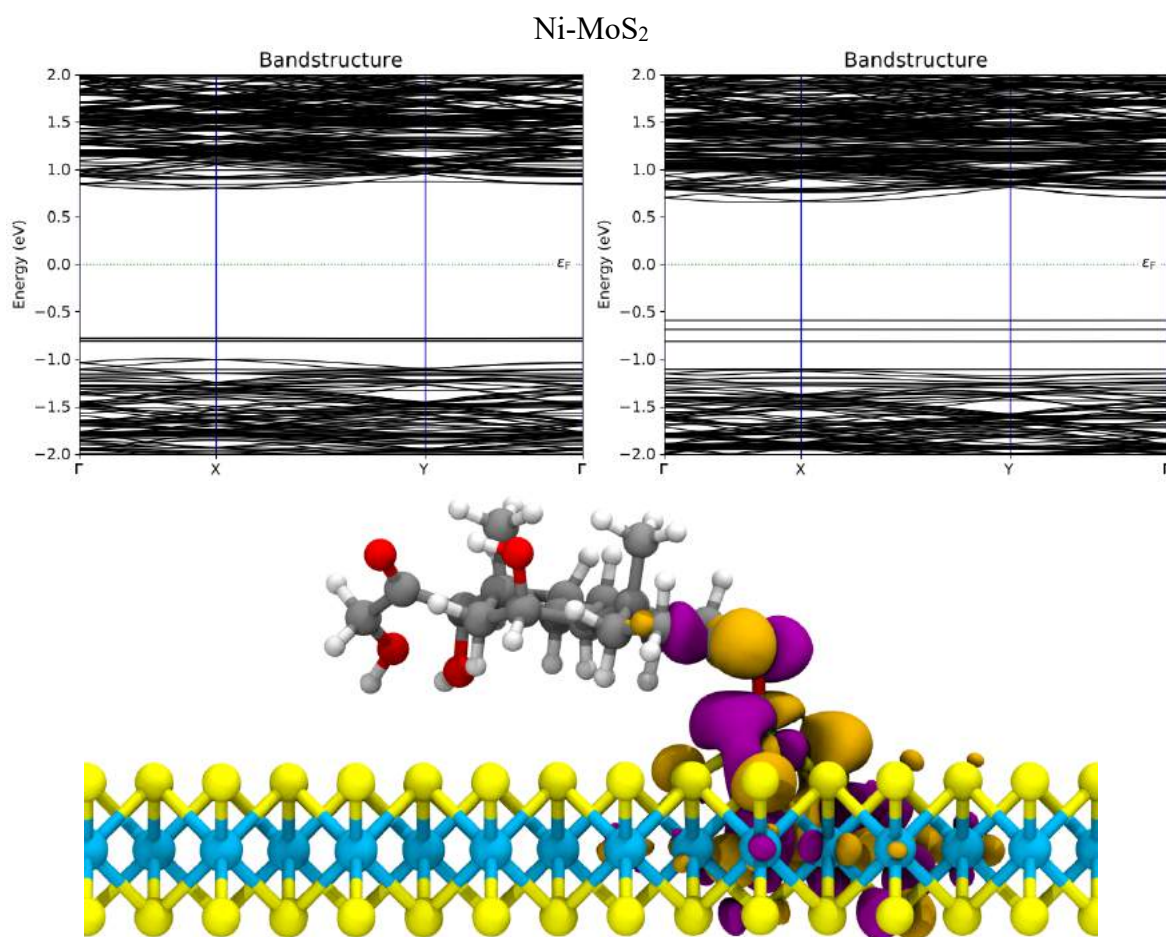

**Figure S3.** Computed DFT bandstructure of Ni-MoS<sub>2</sub> with (top right) and without (top left) the presence of cortisol. The adsorption of the analyte causes the broadening of the original bands due to the Ni metal adatom, as well as hybridization between the states of cortisol and those of Ni-MoS<sub>2</sub>. This can be observed also in the PDOS plot of the complex (see Fig. 8 in the main text). The bottom image shows the HOMO plot of the Ni-MoS<sub>2</sub>/cortisol system (isovalue 0.02 eV/Å<sup>3</sup>), which further confirms the hybrid nature of the valence bands.

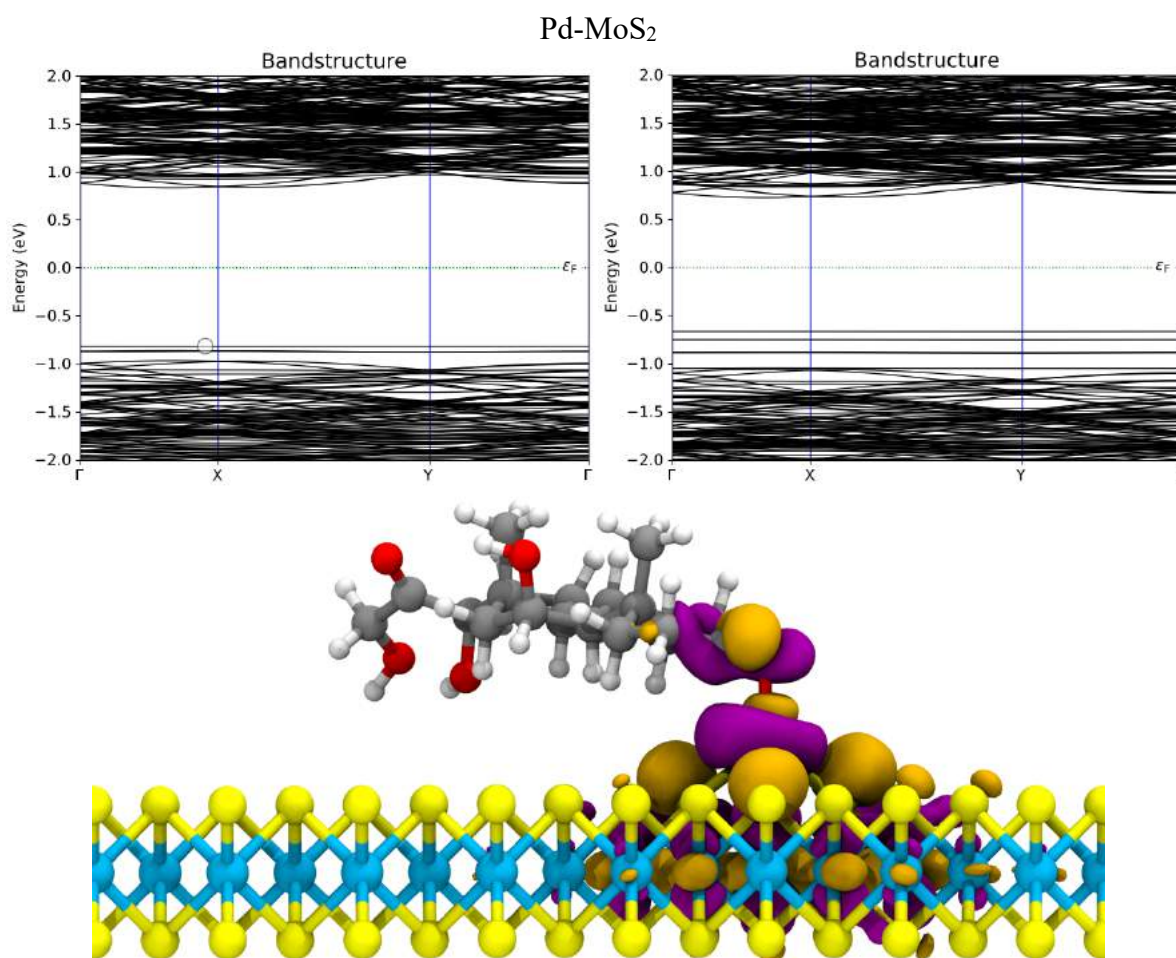

**Figure S4.** Computed DFT bandstructure of Pd-MoS<sub>2</sub> with (top right) and without (top left) the presence of cortisol. The adsorption of the analyte causes the broadening of the original bands due to the Pd metal adatom, as well as hybridization between the states of cortisol and those of Pd-MoS<sub>2</sub>. This can be observed also in the PDOS plot of the complex (see Fig. 8 in the main text). The bottom image shows the HOMO plot of the Pd-MoS<sub>2</sub>/cortisol system (isovalue 0.02 eV/Å<sup>3</sup>), which further confirms the hybrid nature of the valence bands.

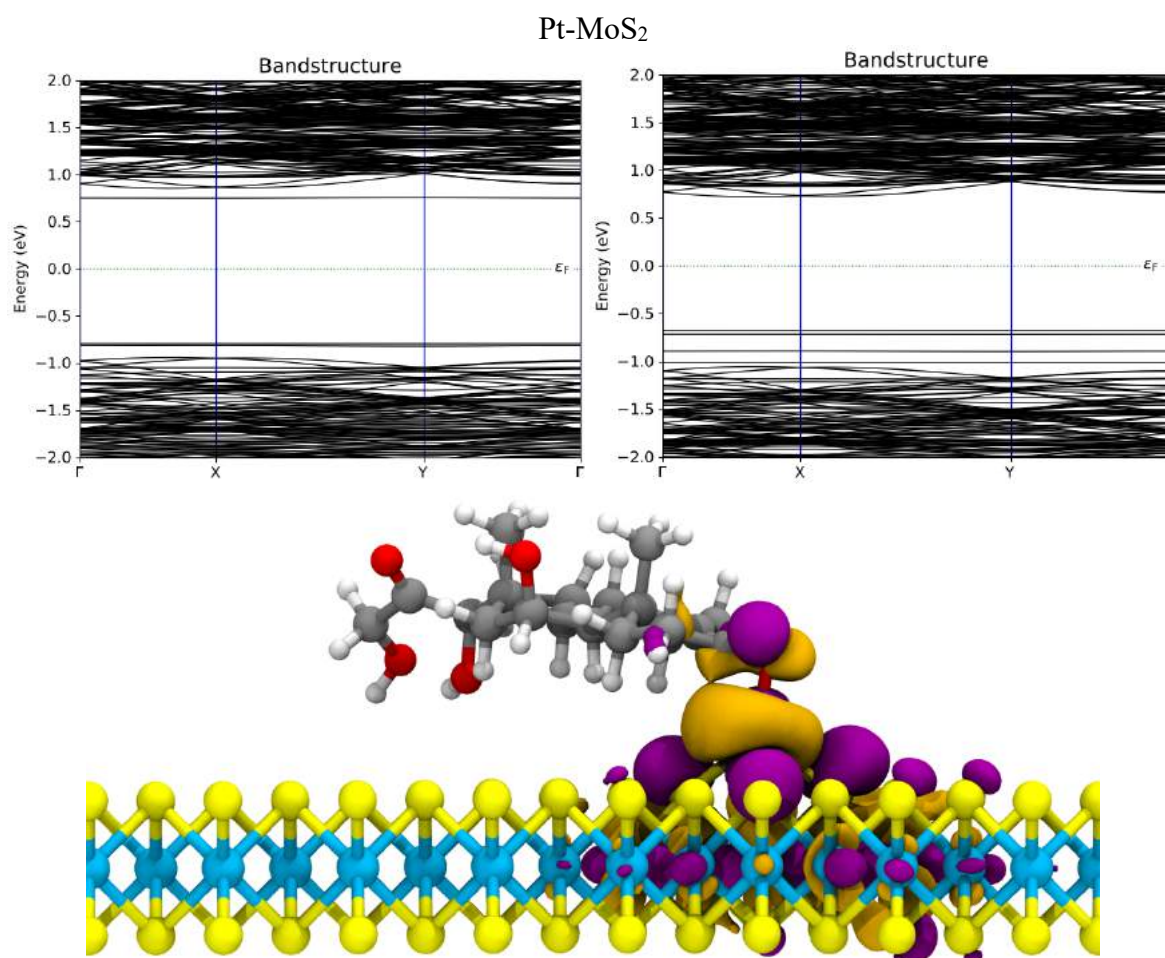

**Figure S5.** Computed DFT bandstructure of Pt-MoS<sub>2</sub> with (top right) and without (top left) the presence of cortisol. The adsorption of the analyte causes the broadening of the original bands due to the Pt metal adatom, as well as hybridization between the states of cortisol and those of Pt-MoS<sub>2</sub>. The removal of the extra conduction band due to Pt doping upon the analyte adsorption can also be observed. This is consistent with the PDOS plot of the complex (see Fig. 8 in the main text). The bottom image shows the HOMO plot of the Pt-MoS<sub>2</sub>/cortisol system (isovalue 0.02 eV/Å<sup>3</sup>), which further confirms the hybrid nature of the valence bands.
